# Supplementary material
Source: Springer Nature journal article supplement (https://www.springermedizin.de/resource/supplementary/12943_2004_80_MOESM8_ESM.pdf/9553390)

7A

PC3-tomatidine

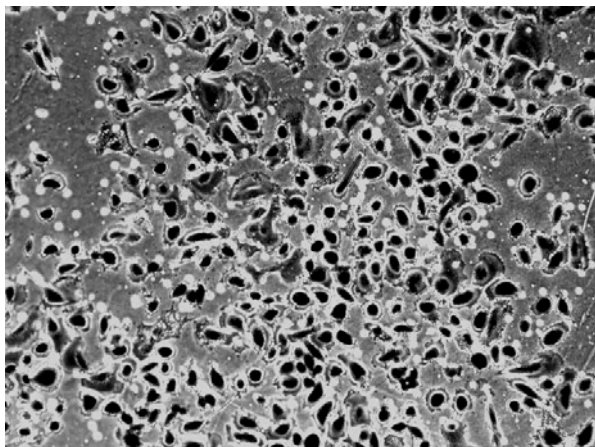

PC3-cycloamine

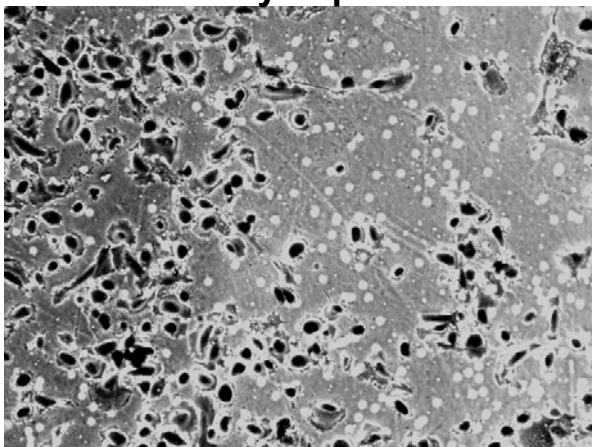

7B

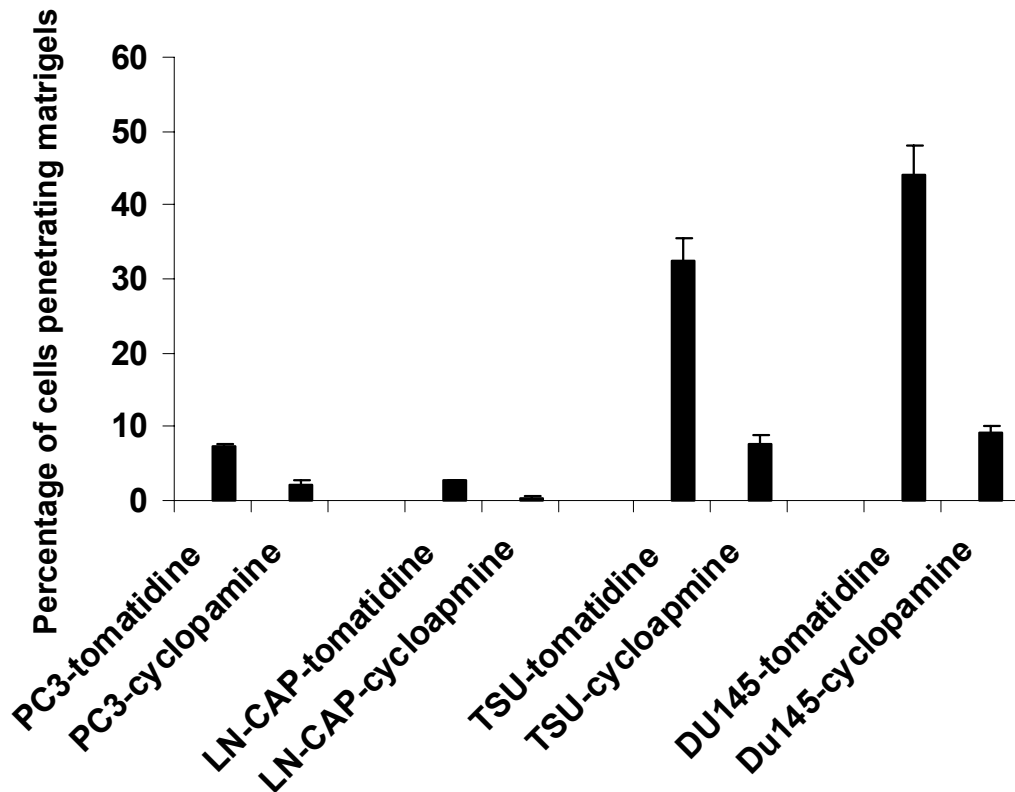

Supplement: MOESM8 [file 9553390]
